# Supplementary material for: Multiple roles of the ER stress sensor IRE1 demonstrated by gene targeting in rice
Source: PubMed Central journal article supplement — Sci Rep. 2012 Dec 10;2:944. doi: 10.1038/srep00944 (PMC3517978; doi:10.1038/srep00944), 2012-12-10
Supplement: srep00944-s1.pdf [file srep00944-s1.pdf]

## SUPPLEMENTARY INFORMATION

### Multiple roles of the ER stress sensor IRE1 demonstrated by gene targeting in rice

Yuhya Wakasa†, Shimpei Hayashi†, Kenjiro Ozawa, Fumio Takaiwa\*

Genetically Modified Organism Research Center, National Institute of Agrobiological  
Sciences, Kannondai 2-1-2, Tsukuba, Ibaraki 305-8602, Japan

\*Corresponding author

†These authors contributed equally to this work.

**Figure S1.** OsbZIP50-dependent gene expression in K833A lines

**Figure S2.** Growth defect in *OsIRE1* KD plants

**Figure S3.** Expression level of *OsIRE1* in GT plants

**Table S1.** PCR primers used in this study

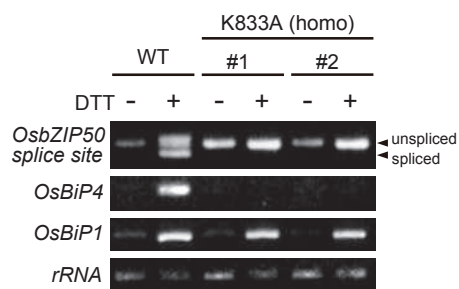

**Supplementary Figure S1. *Os*bZIP50-dependent gene expression in K833A lines.**

RT-PCR analysis of K833A homozygous plants. After treatment for 2 h with or without DTT, two independent lines were analysed by RT-PCR. A 20 base deletion resulting from *Os*IRE1-mediated splicing of *Os*bZIP50 mRNA was investigated (top panel). mRNA levels of *Os*BiP4 reflect the activity of *Os*bZIP50. The ER stress-induced expression of *Os*BiP1 was partially dependent on *Os*bZIP50<sup>8</sup>. First-strand cDNA derived from equal amounts of total RNA were analysed by PCR (30 cycles of 98°C for 10 sec, 58°C for 1 min, 72°C for 1 min) with Ex Taq polymerase (Takara) and specific primer sets (Supplementary Table 1).

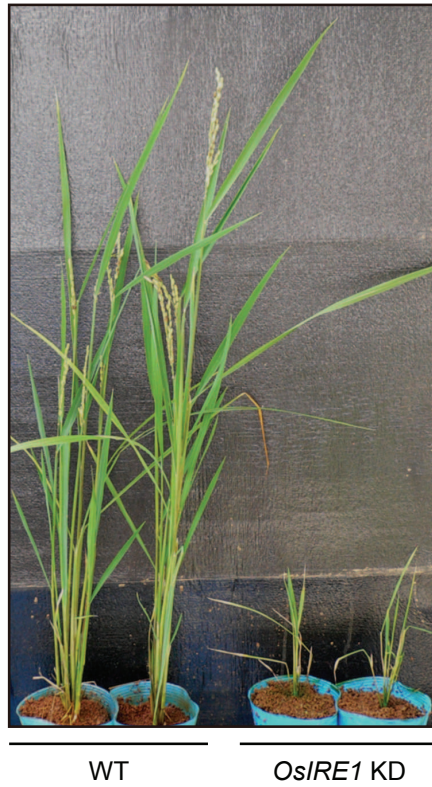

WT

*OsIRE1* KD

**Supplementary Figure S2. Growth defect in *OsIRE1* KD plants.**

Adult plants of *OsIRE1* KD lines in which the expression of *OsIRE1* was severely knocked down. Plants were germinated at approximately the same time and grown under similar conditions.

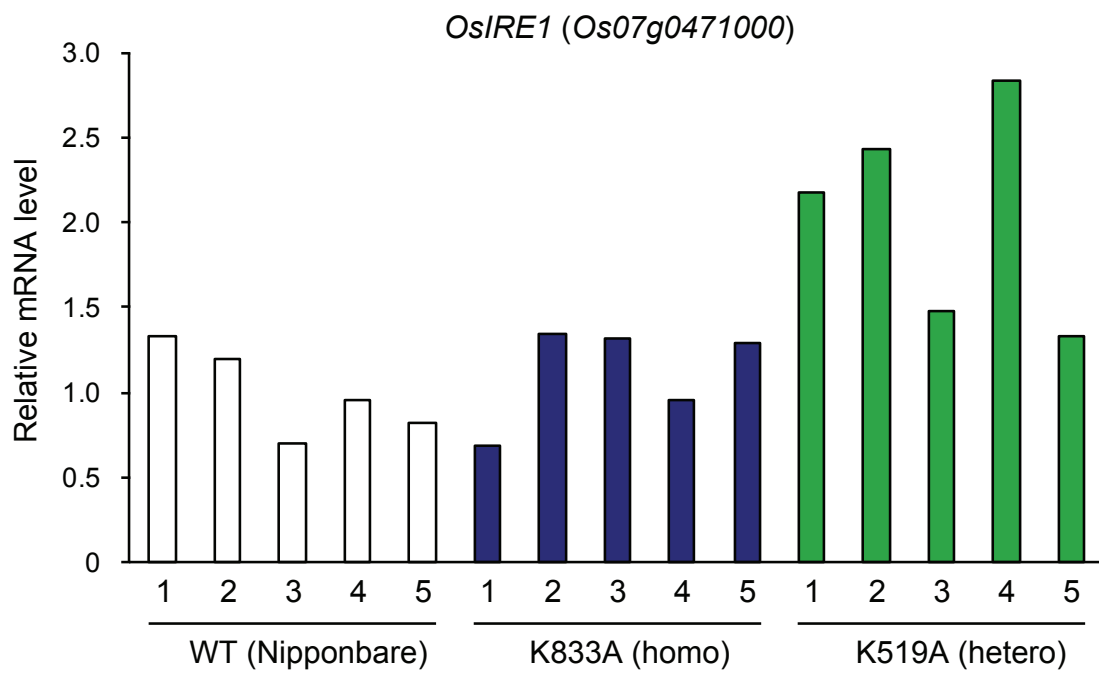

**Supplementary Figure S3. Expression level of *OsIRE1* in GT plants.**

mRNA levels, determined by quantitative RT-PCR, of *OsIRE1* in GT and wild-type plants (Nipponbare).

Five plants of each genotype were analysed.

**Supplementary Table S1. PCR primers used in this study**

| Primer name       | Sequence (5' - 3')                            | Experiments      |
|-------------------|-----------------------------------------------|------------------|
| F1                | GTGTATTTTTGGAATTTCCAAAAATGCTTTTCGGGCATCCG     | Fig. 2a          |
| R1                | CCTGGAGATTATTGCTCGGGTAGATCGTCTTGATGAGACC      | Fig. 2a          |
| R3                | TCTAATTACACCAGTTCTAGAGATGTTGCATGCTGACAATCTGAC | Fig. 2a          |
| F2                | CCAGCACTCGTCCGAGGGCAAAGGAATAG                 | Fig. 2a          |
| R2                | TTGCACGGCGCGGGAGCGATGGGGAGC                   | Fig. 2a          |
| K519 HaeIII F     | CAATGGGCGTCAGATTGGTAAGCTTTG                   | Fig. 2b          |
| K519 HaeIII R     | ATCAAGTTAAGCTATGCATAAGCGTG                    | Fig. 2b          |
| K833 MspI F       | GTGGATCACATACCAGAAGCAGTGC                     | Fig. 2b          |
| K833 MspI R       | ATCATCACA AACTAGCACACTACATAG                  | Fig. 2b          |
| Ubiquitin F       | GTGGTGGCCAGTAAGTCCTC                          | Fig. 3 & Fig. S3 |
| Ubiquitin R       | GGACACAATGATTAGGGATCA                         | Fig. 3 & Fig. S3 |
| Os10g0552600 F    | GAGCAGTCTGAACTCTCTGAAC                        | Fig. 3           |
| Os10g0552600 R    | GGTCACAACCAACACTTACAC                         | Fig. 3           |
| Os03g0103100 F    | CTTAATTACCATACCATTACAC                        | Fig. 3           |
| Os03g0103100 R    | GATGGATCAATCATATCATATCAG                      | Fig. 3           |
| BiP4 qRT F        | CACACGTCATTACCACGTCTC                         | Fig. 3a          |
| BiP4 qRT R        | ACGTCAGTGGCGTGATCTGG                          | Fig. 3a          |
| bZIP50 qRT F      | TGGATGGCGATGATCCCATGAGC                       | Fig. 3a          |
| bZIP50 qRT R      | TGCGCAGCACTGAAGCGCGTAG                        | Fig. 3a          |
| bZIP50 splicing F | CCAGAGCTTGTTGAAGGATAG                         | Fig. S1          |
| bZIP50 splicing R | GGTTTCGGTTGGGTAGAC                            | Fig. S1          |
| BiP4 F            | CAAGGAGGAGTACGAGGAGAAG                        | Fig. S1          |
| BiP4 R            | CACACTTTTCGATCGAATCCAAAC                      | Fig. S1          |
| BiP1 F            | TGAACGTGAAGGCTGAGGAC                          | Fig. S1          |
| BiP1 R            | CTACAGCTCGTCATGCACG                           | Fig. S1          |
| rRNA F            | ACACGGGGAAACTTACCAGGTC                        | Fig. S1          |
| rRNA R            | CCAGAACATCTAAGGGCATCAC                        | Fig. S1          |
| IRE1 qRT F        | GTTAGATCCAGATCCAGAGAAGAGAC                    | Fig. S3          |
| IRE1 qRT R        | GCCTTCCAAAGCATCTATGAGATCAG                    | Fig. S3          |
